# Supplementary material for: Cell-free synthesis of proteins with selectively 13 C-labelled methyl groups from inexpensive precursors
Source: Copernicus journal article supplement (doi:10.5194/mr-4-187-2023), 2023-07-19
Supplement: Supplementary file [file mr-4-187-2023-supplement.pdf]

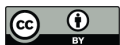

*Supplement of*

## **Cell-free synthesis of proteins with selectively $^{13}\text{C}$ -labelled methyl groups from inexpensive precursors**

**Damian Van Raad et al.**

*Correspondence to:* Gottfried Otting ([gottfried.otting@anu.edu.au](mailto:gottfried.otting@anu.edu.au)) and Thomas Huber ([t.huber@anu.edu.au](mailto:t.huber@anu.edu.au))

The copyright of individual parts of the supplement might differ from the article licence.

## Supporting Information

### Nucleotide sequences

#### pCDF CTH lac PpiB

AGATCTCGATCCCGCGAAATTAATACGACTCACTATAGGGGAATTGTGAGCGGATAACAATTCCGAGACCACA  
ACGGTTTCCCTCTAGAAATAATTTTGTTTAACTTTAAGAAGGAGATATACATATGGTTACTTTCCACACCAATCA  
CGGCGATATTGTCATCAAACTTTTGACGATAAAGCACCTGAAACAGTTAAAACTTCTGGACTACTGCCGC  
GAAGGTTTTTACAACAACACCATTTTCCACCGTGTATCAACGGCTTATGATTCAGGGCGGCGGTTTTGAACC  
GGGCATGAAACAAAAGCCACCAAAGAACCAGTCAAAAACGAAGCCAACAACGGCCTGAAAAATACCCGTG  
GTACGCTGGCAATGGCACGTAAGGCTCCGCACTCTGCAACTGCACAGTTCTTCATCAACGTGGTTGATAA  
CGACTTCTGAACTTCTCTGGCGAAAGCCTGCAAGTTGGGGCTACTGCGTGTGCTGAAGTGGTTGACGGC  
ATGGACGTGGTAGACAAAATCAAAGGTGTTGCAACCGGTCGTAGCGGTATGCATCAGGACGTGCCAAAAGA  
AGACGTTATCATTGAAAGCGTGACCGTTAGCGAGCACCACCATCATCACCCTAAGAATTCGAGCTCCCGGGT  
ACCATGGCATGCATCGATAGATCCGGCTGCTAACAAAGCCGAAAGGAAGCTGAGTTGGCTGCTGCCACCGC  
TGAGCAATAACTAGCATAACCCCTTGGGGCCTCTAACGGGTCTTGAGGGTTTTTTGCTGAAAGGAGGA  
ACAGGCATTTGAGAAGCACACGGTCACACTGCTCCGGTAGTCAATAAACCGGTAAACCAGCAATAGACATAA  
GCGGCTATTTAACGACCCTGCCCTGAACCGACGACCGGGTCATCGTGCCGGATCTTGCGGCCCTCGGCTTG  
AACGAATTGTTAGACATTATTTGCCGACTACCTTGGTGATCTCGCCTTTCACGTAGTGGACAAATTCTTCCA  
GATCTGCGCGGAGGCCAAGCGATCTTCTTGTCCAAGATAAGCCTGTCTAGTTCAGTATGACGGGCTG  
ATACTGGGCCGGCAGGCGCTCCATTGCCAGTCGGCAGCGACATCCTTCGGCGCGATTTTGCCGGTTACTGCG  
CTGTACCAAATGCGGGACAACGTAAGCACTACATTTTCGTCATCGCCAGCCAGTCGGGCGGCGAGTTCCATA  
GCGTTAAGGTTTCATTTAGCGCCTCAAATAGATCCTGTTCAAGAACCGGATCAAAGAGTTCCTCCGCCGCTGG  
ACCTACCAAGGCAACGCTATGTTCTTGTCTTTGTCAGCAAGATAGCCAGATCAATGTCGATCGTGGCTGGCT  
CGAAGATACCTGCAAGAATGTCATTGCGCTGCCATTCTCAAATTGCAGTTCGCGCTTAGCTGGATAACGCCA  
CGGAATGATGTCGTCGTGCACAACAATGGTGACTTCTACAGCGCGGAGAATCTCGCTCTCTCCAGGGGAAGC  
CGAAGTTTCCAAAAGGTCGTTGATCAAAGCTCGCCGCTTGTTCATCAAGCCTTACGGTCACCGTAACCAGC  
AAATCAATATCACTGTGTGGCTTACAGCCGCCATCCACTGCGGAGCCGTACAAATGTACGGCCAGCAACGTCG  
GTTTCGAGATGGCGCTCGATGACGCCAACTACCTCTGATAGTTGAGTCGATACTTCGGCGATCACCGCTTCCCTC  
ATACTCTTCTTTTCAATATTATTGAAGCATTATCAGGGTTATTGTCTCATGAGCGGATACATATTTGAATGT  
ATTTAGAAAAATAACAAATAGCTAGCTACTCGGTGCTACGCTCCGGGCGTGAGACTGCGGCGGGCGCTG  
CGGACACATACAAAGTTACCCACAGATTCCGTGGATAAGCAGGGGACTAACATGTGAGGCAAAACAGCAGG  
GCCGCGCCGGTGGCGTTTTTCCATAGGCTCCGCCCTCTGCCAGAGTTCACATAAACAGACGTTTTCCGGTGC  
ATCTGTGGGAGCCGTGAGGCTCAACCATGAATCTGACAGTACGGGCGAAACCCGACAGGACTTAAAGATCCC  
CACCGTTTTCCGGCGGGTCGCTCCCTCTTGCCTCTCTGTTCCGACCTGCCGTTTACCGGATACCTGTTCCGCC  
TTTTCTCCCTTACGGGAAGTGTGGCGCTTCTCATAGCTCACACTGGTATCTCGGCTCGGTGTAGGTCGTTCCG  
CTCCAAGCTGGGCTGTAAGCAAGAAGTCCCCGTTCCAGCCGACTGCTGCGCCTTATCCGGTAACTGTTCACTTG  
AGTCCAACCCGAAAAGCACGGTAAAACGCCACTGGCAGCAGCCATTGGTAACTGGGAGTTCGAGAGGATT  
TGTTTAGCTAAACACCGGTTGCTCTTGAAGTGTGCGCAAAGTCCGGGCTACACTGGAAGGACAGATTTGGTT  
GCTGTGCTCTGCGAAAGCCAGTTACCACGGTTAAGCAGTTCCCCACTGACTTAACCTTCGATCAAACCACCTC  
CCCAGGTGGTTTTTTTCTTTACAGGGCAAAGATTACGCGCAGAAAAAAGGATCTCAAGAAGATCCTTTGAT  
CTTTTCTACTGAACCGCTCTAGATTTCAAGTCAATTTATCTTCAAATGTAGCACCTGAAGTCAGCCCCATACG  
ATATAAGTTGTAATTCTCATGTTAGTCATGCCCCGCGCCACCGGAAGGAGCTGACTGGGTTGAAGGCTCTCA  
AGGGCATCGGTGAGATCCCGGTGCCTAATGAGTGAGCTAACTTACATTAATTGCGTTGCGCTCACTGCCCGC  
TTTTCCAGTCGGGAAACCTGTCGTGCCAGCTGCATTAATGAATCGGCCAACGCGGGGAGAGGCGGTTTTGCG  
TATTGGGCGCCAGGGTGGTTTTTCTTTTACCAGTGAGACGGGCAACAGCTGATTGCCCTTACCAGCTGGCC

CTGAGAGAGTTGCAGCAAGCGGTCCACGCTGGTTTGCCCCAGCAGGCGAAAATCCTGTTTGATGGTGGTTAA  
CGGCGGGATATAACATGAGCTGTCTTCGGTATCGTCGTATCCCACTACCGAGATGTCCGCACCAACGCGCAGC  
CCGACTCGGTAATGGCGCGCATTGCGCCAGCGCCATCTGATCGTTGGCAACCAGCATCGCAGTGGGAACG  
ATGCCCTCATTAGCATTGTCATGGTTTGTGAAAACCGGACATGGCACTCCAGTCGCCTTCCCGTTCCGCTAT  
CGGCTGAATTTGATTGCGAGTGAGATATTTATGCCAGCCAGCCAGACGCAGACGCGCCGAGACAGAACTTAA  
TGGGCCCGCTAACAGCGCGATTTGCTGGTGACCCAATGCGACCAGATGCTCCACGCCAGTCGCGTACCGTCT  
TCATGGGAGAAAATAATACTGTTGATGGGTGTCTGGTCAGAGACATCAAGAAATAACGCCGGAACATTAGTG  
CAGGCAGCTTCCACAGCAATGGCATCCTGGTCATCCAGCGGATAGTTAATGATCAGCCACTGACGCGTTGCG  
CGAGAAGATTGTGCACCGCCGCTTACAGGCTTCGACGCCGCTTCGTTCTACCATCGACACCACCACGCTGGC  
ACCCAGTTGATCGGCGCGAGATTTAATCGCCGCGACAATTTGCGACGGCGGTGCAGGGCCAGACTGGAGGT  
GGCAACGCCAATCAGCAACGACTGTTTGCCCGCAGTTGTTGTGCCACGCGGTTGGGAATGTAATTCAGCTCC  
GCCATCGCCGCTTCCACTTTTTCCCGCGTTTTCGCAGAAACGTGGCTGGCCTGGTTCACCACGCGGGAAACGG  
TCTGATAAGAGACACCGGCATACTCTGCGACATCGTATAACGTTACTGGTTTACATTACACCCTGAATTGA  
CTCTCTCCGGGCGCTATCATGCCATACCGGAAAGGTTTTGCGCCATTCGATGGTGTCCGGGATCTCGACGCT  
CTCCCTTATGCGACTCCTGCATTAGGTGCGGTTGTCAGCCTGTCCCGC

### **pCDF lac CTH ubi**

AGATCTCGATCCCGCAAATTAATACGACTCACTATAGGGGAATTGTGAGCGGATAACAATTCCCCTCTAGAA  
ATAATTTTGTAACTTAAAGAAGGAGATACATATGCAGATCTTCGTGAAGACTCTGACTGGTAAGACCATC  
ACCCTCGAGGTTGAGCCAGTGACACCATTGAGAATGTCAAGGCAAAGATCCAAGATAAGGAAGGCATCCCT  
CCTGACCAGCAGAGGCTGATCTTTGCTGGAACAGCTGGAAGATGGGCGCACCCCTGTCTGACTACAACATCC  
AGAAAGAGTCCACCCTGCACCTGGTACTCCGTCTCAGAGGTGGATCTCATCACCATCACCATCACTAAGAATC  
GAGCTCCCGGTACCATGGCATGCATCGATAGATCCGGCTGCTAACAAAGCCCGAAAGGAAGCTGAGTTGGC  
TGCTGCCACCGCTGAGCAATAACTAGCATAACCCCTTGGGGCTCTAACGGGTCTTGAGGGTTTTTTGCTG  
AAAGGAGGAACACAGGCATTTGAGAAGCACACGGTCACACTGCTTCCGGTAGTCAATAAACCGGTAAACCA  
GCAATAGACATAAGCGGCTATTTAACGACCCTGCCCTGAACCGACGACCGGGTCATCGTGGCCGGATCTTGCG  
GCCCTCGGCTTGAACGAATTGTTAGACATTATTGCCGACTACCTTGGTGTCTCGCCTTTCACGTAGTGGAC  
AAATTCTTCAACTGATCTGCGCGGAGGCCAAGCGATCTTCTTGTCCAAGATAAGCCTGTCTAGCTTCAA  
GTATGACGGGCTGATACTGGGCCGAGGCGCTCCATTGCCAGTCGGCAGCGACATCCTTCGGCGCGATTT  
TGCCGGTACTGCGCTGTACCAAATGCGGGACAACGTAAGCACTACATTCGCTCATCGCCAGCCAGTCGGG  
CGGCGAGTTCCATAGCGTTAAGGTTTCATTTAGCGCCTCAAATAGATCCTGTTGAGGAACCGGATCAAAGAGT  
TCCTCCGCCGCTGGACCTACCAAGGCAACGCTATGTTCTTGTCTTTGTCAGCAAGATAGCCAGATCAATGTC  
GATCGTGGCTGGCTCGAAGATACTGCAAGAATGTCATTGCGCTGCCATTCTCAAATTGCAGTTTCGCGCTTA  
GCTGGATAACGCCACGGAATGATGTCGTGTCGACACAACATGGTGACTTCTACAGCGCGGAGAATCTCGCTCT  
CTCCAGGGGAAGCCGAAGTTTTCAAAGGTCGTTGATCAAAGCTCGCCGCGTTGTTTTCATCAAGCCTTACGGT  
CACCGTAACCAGCAAATCAATATCACTGTGTGGCTTACAGGCCCATCCACTGCGGAGCCGTACAAATGTACG  
GCCAGCAACGTCGGTTCGAGATGGCGCTCGATGACGCCAACTACCTCTGATAGTTGAGTCGATACTTCGGCGA  
TCACCGCTTCCCTCATACTCTCCTTTTTCAATATTATTGAAGCATTATCAGGGTTATTGTCTCATGAGCGGATA  
CATATTTGAATGATTTAGAAAAATAACAAATAGCTAGCTCACTCGGTCGCTACGCTCCGGGCGTGAGACTG  
CGGCGGGCGCTGCGGACACATACAAAGTTACCCACAGATTCCGTGGATAAGCAGGGGACTAACATGTGAGG  
CAAAACAGCAGGGCCGCGCCGGTGGCGTTTTTCCATAGGCTCCGCCCTCCTGCCAGAGTTCACATAAACAGAC  
GCTTTTCCGGTGCATCTGTGGGAGCCGTGAGGCTCAACCATGAATCTGACAGTACGGGCGAAACCCGACAGG  
ACTTAAAGATCCCCACCGTTTCCGGCGGGTGCCTCCCTTTCGCTCTCCTGTTCCGACCCTGCCGTTTACCGG  
ATACCTGTTCCGCTTTCCTTACGGGAAGTGTGGCGCTTCTCATAGCTCACACTGGTATCTCGGCTCG  
GTGTAGGTCGTTGCTCCAAGCTGGGCTGTAAGCAAGAACTCCCGTTCAGCCCGACTGCTGCGCCTTATCCG  
GTAAGTGTCACTTGAGTCCAACCCGAAAAGCACGGTAAAACGCCACTGGCAGCAGCCATTGGTAACTGGG

AGTTCGCAGAGGATTTGTTTAGCTAAACACGCGGTTGCTCTTGAAGTGTGCGCCAAAGTCCGGCTACACTGGA  
AGGACAGATTTGGTTGCTGTGCTCTGCGAAAGCCAGTTACCACGGTTAAGCAGTTCCCCAACTGACTTAACCTT  
CGATCAAACACCTCCCAGGTGGTTTTTCGTTTACAGGGCAAAGATTACGCGCAGAAAAAAGGATCTCA  
AGAAGATCCTTTGATCTTTTCTACTGAACCGCTCTAGATTTACAGTGCAATTTATCTCTTCAAATGTAGCACCTGA  
AGTCAGCCCCATACGATATAAGTTGTAATTCTCATGTTAGTCATGCCCCGCGCCACCGGAAGGAGCTGACTG  
GGTTGAAGGCTCTCAAGGGCATCGGTGAGATCCCGGTGCCTAATGAGTGAGCTAACTTACATTAATTGCGTT  
GCGCTCACTGCCCGCTTTCCAGTCGGGAAACCTGTCGTGCCAGCTGCATTAATGAATCGGCCAACGCGCGGGG  
AGAGGCGGTTTGCATTTGGGCGCCAGGGTGGTTTTCTTTTACCAGTGAGACGGGCAACAGCTGATTGCC  
TTCACCGCCTGGCCCTGAGAGAGTTGCAGCAAGCGGTCCACGCTGGTTTGCCCCAGCAGGCGAAAATCCTGTT  
TGATGGTGGTTAACGGCGGGATATAACATGAGCTGTCTTCGGTATCGTCGTATCCCACTACCGAGATGTCCGC  
ACCAACGCGCAGCCCGACTCGGTAATGGCGCGCATTGCGCCAGCGCCATCTGATCGTTGGCAACCAGCAT  
CGCAGTGGGAACGATGCCCTCATTACAGCATTTGCATGGTTTTGTTGAAAACCGGACATGGCACTCCAGTCGCCT  
TCCC GTTCCGCTATCGGCTGAATTTGATTGCGAGTGAGATATTTATGCCAGCCAGCCAGACGCAGACGCGCCG  
AGACAGAACTTAATGGGCCCCGCTAACAGCGCGATTTGCTGGTGACCCAATGCGACCAGATGCTCCACGCCCA  
GTCGCGTACCGTCTTCATGGGAGAAAATAATACTGTTGATGGGTGTCTGGTCAGAGACATCAAGAAATAACG  
CCGGAACATTAGTGCAGGCAGCTTCCACAGCAATGGCATCCTGGTCATCCAGCGGATAGTTAATGATCAGCCC  
ACTGACGCGTTGCGCGAGAAGATTGTGCACCGCCGCTTACAGGCTTCGACGCCGCTTCGTTCTACCATCGAC  
ACCACCAGCTGGCACCCAGTTGATCGGCGCGAGATTTAATCGCCGCGACAATTTGCGACGGCGCGTGCAGG  
GCCAGACTGGAGGTGGCAACGCCAATCAGCAACGACTGTTTGCCCGCCAGTTGTTGTGCCACGCGGTTGGGA  
ATGTAATTCAGCTCCGCCATCGCCGTTCCACTTTTTCCCGCGTTTTTCGAGAAACGTGGCTGGCCTGGTTAC  
CACGCGGGAAACGGTCTGATAAGAGACACCGGCATACTCTGCGACATCGTATAACGTTACTGGTTTCACATTC  
ACCACCCTGAATTGACTCTCTTCCGGGCGCTATCATGCCATACCGCGAAAGGTTTTGCGCCATTGATGGTGTG  
CGGGATCTCGACGCTCTCCCTTATGCGACTCCTGCATTAGGTGGGTTGTCAGCCTGTCCCGC

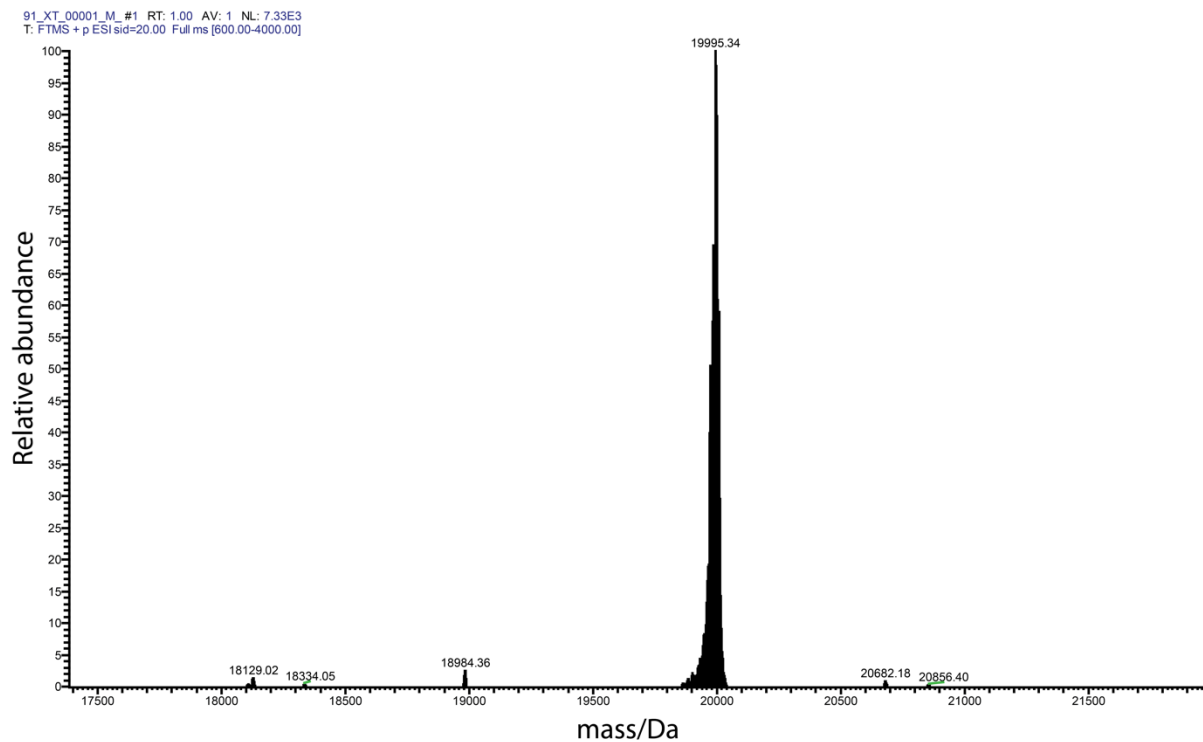

**Figure S1.** High-resolution mass spectrum of perdeuterated PpiB. The calculated mass for complete deuteration is 20,257 Da (18,966 Da at natural isotopic abundance, including the mass of the C-terminal His<sub>6</sub>-tag of the construct). The perdeuterated amino acids lysine, arginine, histidine and glutamine added to the reaction mixture also contained <sup>15</sup>N, whereas all other non-valine amino acids were perdeuterated without any other heavy isotope. The mass observed indicates > 90% deuteration of PpiB, taking into account the back-exchange of exchangeable protons during protein purification.

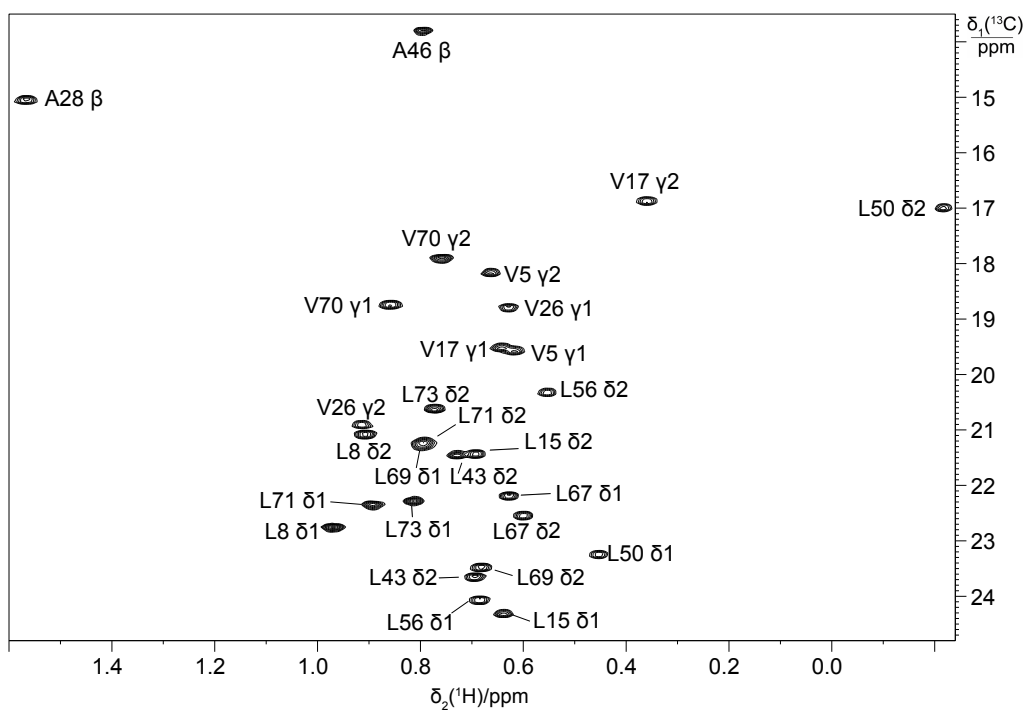

**Figure S2.**  $^{13}\text{C}$ -HSQC spectra of ubiquitin expressed in a 5 mL CFPS reaction using 300 mg eCells with  $1\text{-}^{13}\text{C}$ -glucose. Valine and leucine were omitted from the amino acid mixture. Protein yield 1.4 mg,  $^{13}\text{C}$ -enrichment of the valine/leucine methyl groups  $\sim 44\%$ .

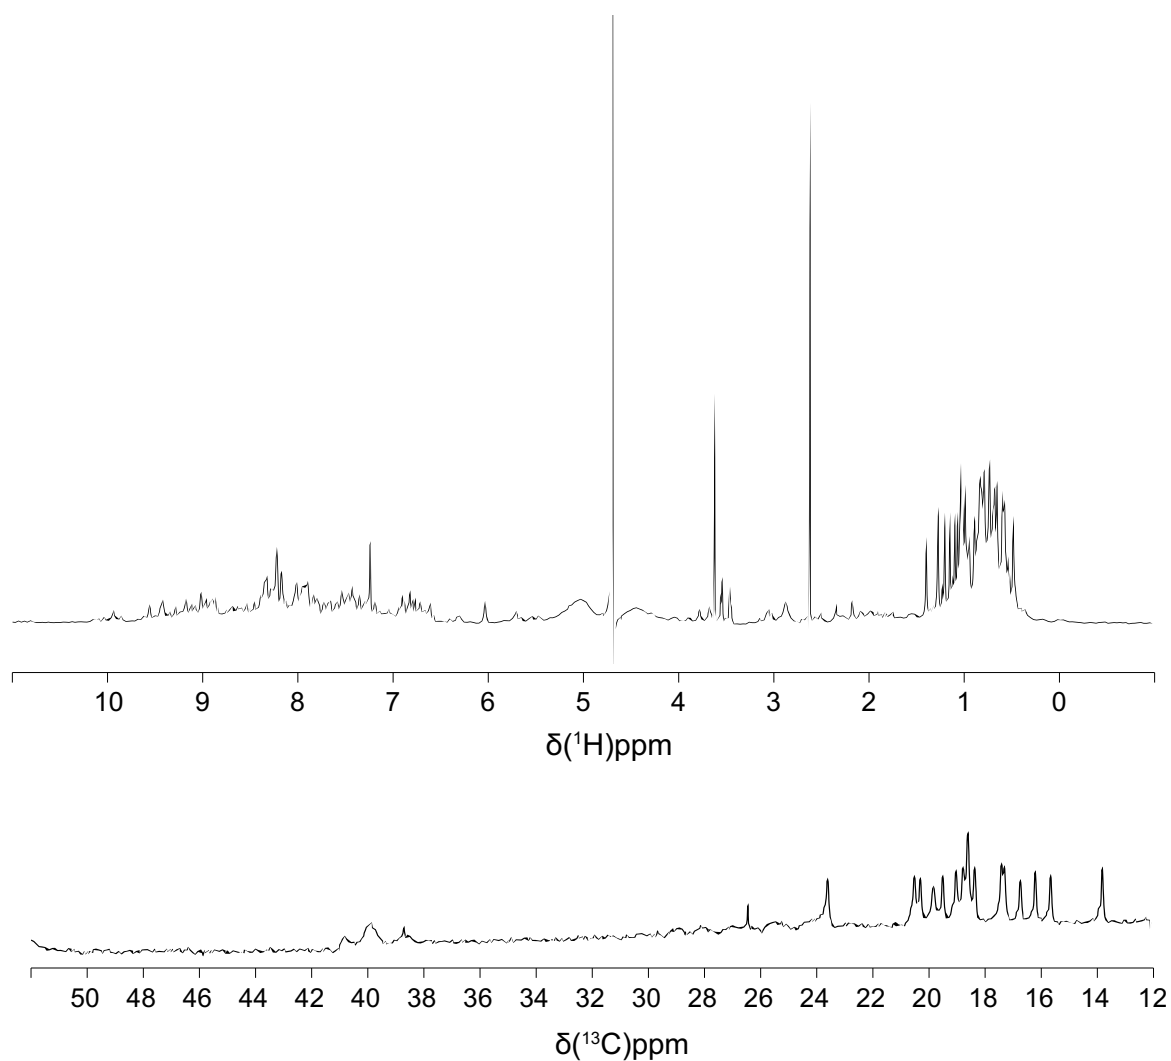

**Figure S3.** 1D  $^1\text{H}$ - and  $^{13}\text{C}$ -NMR spectra of PpiB expressed from 20 mL  $\text{D}_2\text{O}$  CFPS reaction using 800 mg eCells with 2- $^{13}\text{C}$ -methyl-4- $^2\text{H}_3$ -acetolactate. The sample is the same as that used for Figure 5B of the main text. Upper panel:  $^1\text{H}$ -NMR spectrum recorded without  $^{13}\text{C}$ -decoupling. The undeuterated methyl groups of valine between 0.5 and 1.5 ppm are the most prominent signals of the protein. Amide protons are observed due to some back-exchange during protein purification and measurement in 90 %  $\text{H}_2\text{O}$ /10 %  $\text{D}_2\text{O}$ . Lower panel:  $^{13}\text{C}$ -NMR spectrum recorded with  $^1\text{H}$ -decoupling. The spectra illustrate the high level of deuteration achieved.

**Table S1.** List of  $^2\text{H}$  amino acids and their contribution to the cost of stereospecific perdeuterated eCell CFPS reaction to produce perdeuterated PpiB from 800 mg eCells in 20 mL CFPS buffer.<sup>1</sup>

| Amino acid | CIL catalogue # | Price/g (USD) | Amount used (1 mM in 20 mL) | Cost of amount used (USD) |
|------------|-----------------|---------------|-----------------------------|---------------------------|
| A          | DLM-251-1       | 634           | 1.8 mg                      | 1.1                       |
| R          | DLM-541-0.1     | 11520         | 3.5 mg                      | 40.3                      |
| G          | DLM-280-5       | 50            | 1.5 mg                      | 0.1                       |
| H          | DNLM-7366-0.25  | 10396         | 3.1 mg                      | 32.2                      |
| K          | DLM-570-0.1     | 4160          | 2.9 mg                      | 12.1                      |
| P          | DLM-487-0.25    | 5200          | 2.3 mg                      | 12.0                      |
| S          | DLM-582-PK      | 1632          | 2.1 mg                      | 3.4                       |
| T          | DNLM-7367-0.5   | 4310          | 2.4 mg                      | 10.3                      |
| V          | DLM-488-PK      | 1244          | N/A                         | N/A                       |
| N          | DLM-6844-0.1    | 6770          | 2.6 mg                      | 17.6                      |
| D          | DLM-546-0.25    | 2056          | 2.7 mg                      | 5.6                       |
| C          | DLM-6901-0.1    | 10550         | 2.4 mg                      | 25.3                      |
| E          | DLM-556-0.1     | 4270          | 2.9 mg                      | 12.4                      |
| Q          | DNLM-6997-PK    | 5200          | 2.9 mg                      | 15.1                      |
| L          | DLM-567-PK      | 2120          | 2.6 mg                      | 5.5                       |
| M          | DLM-6797-PK     | 3530          | 3 mg                        | 10.6                      |
| W          | DLM-6903-0.25   | 6356          | 4.1 mg                      | 26.1                      |
| Y          | DNLM-7373-PK    | 4404          | 3.6 mg                      | 15.9                      |
| I          | DLM-141-0.25    | 4864          | 2.6 mg                      | 12.6                      |
| F          | DLM-372-PK      | 600           | 3.3 mg                      | 2.0                       |

<sup>1</sup> Prices from Cambridge Isotope Laboratories accessed 3<sup>rd</sup> April 2023. The total cost of the final column is USD 260.



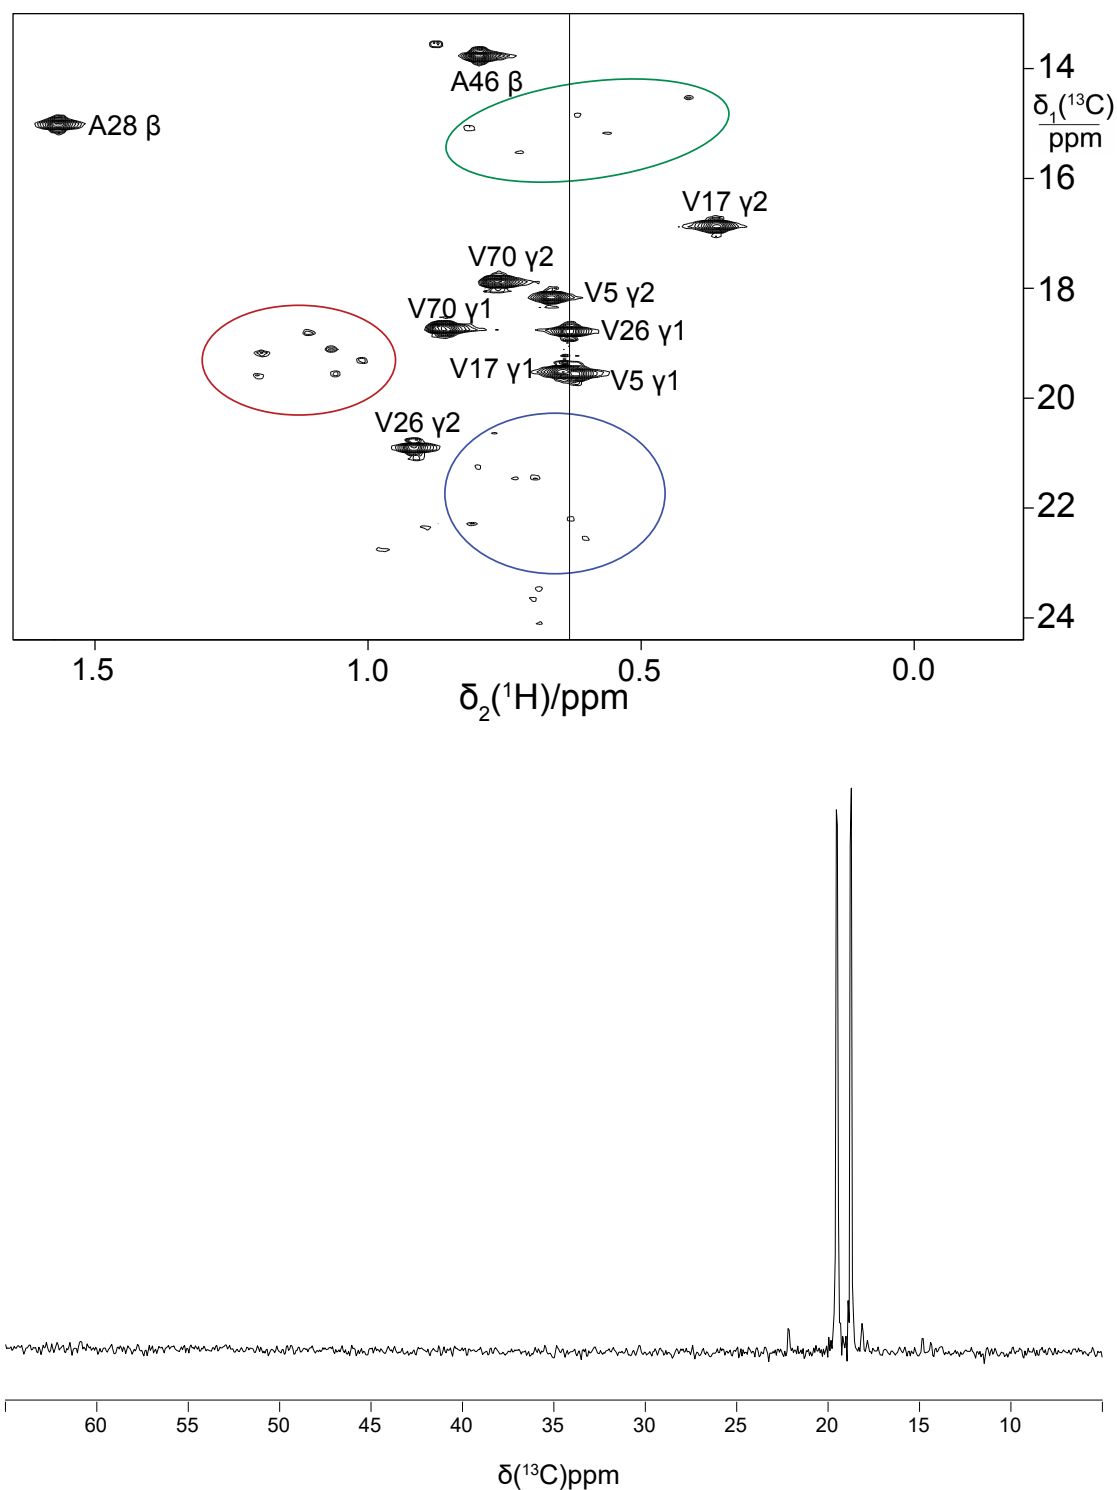

**Figure S4.**  $^{13}\text{C}$ -HSQC spectrum of ubiquitin (Figure 3A in the main text) plotted at lower contour levels. The green, red and blue circles identify cross-peaks from isoleucine  $\text{C}^{\delta 1}\text{H}_3$ , threonine  $\text{C}^{\gamma}\text{H}_3$  and leucine  $\text{C}^{\delta 1/\delta 2}\text{H}_3$  groups, respectively. Contours were plotted at levels increasing 1.4-fold between subsequent contour levels. Undesired cross-peaks are about 30-fold weaker than the expected cross-peaks. A vertical line marks the location, where the cross-section displayed in the lower panel was taken.

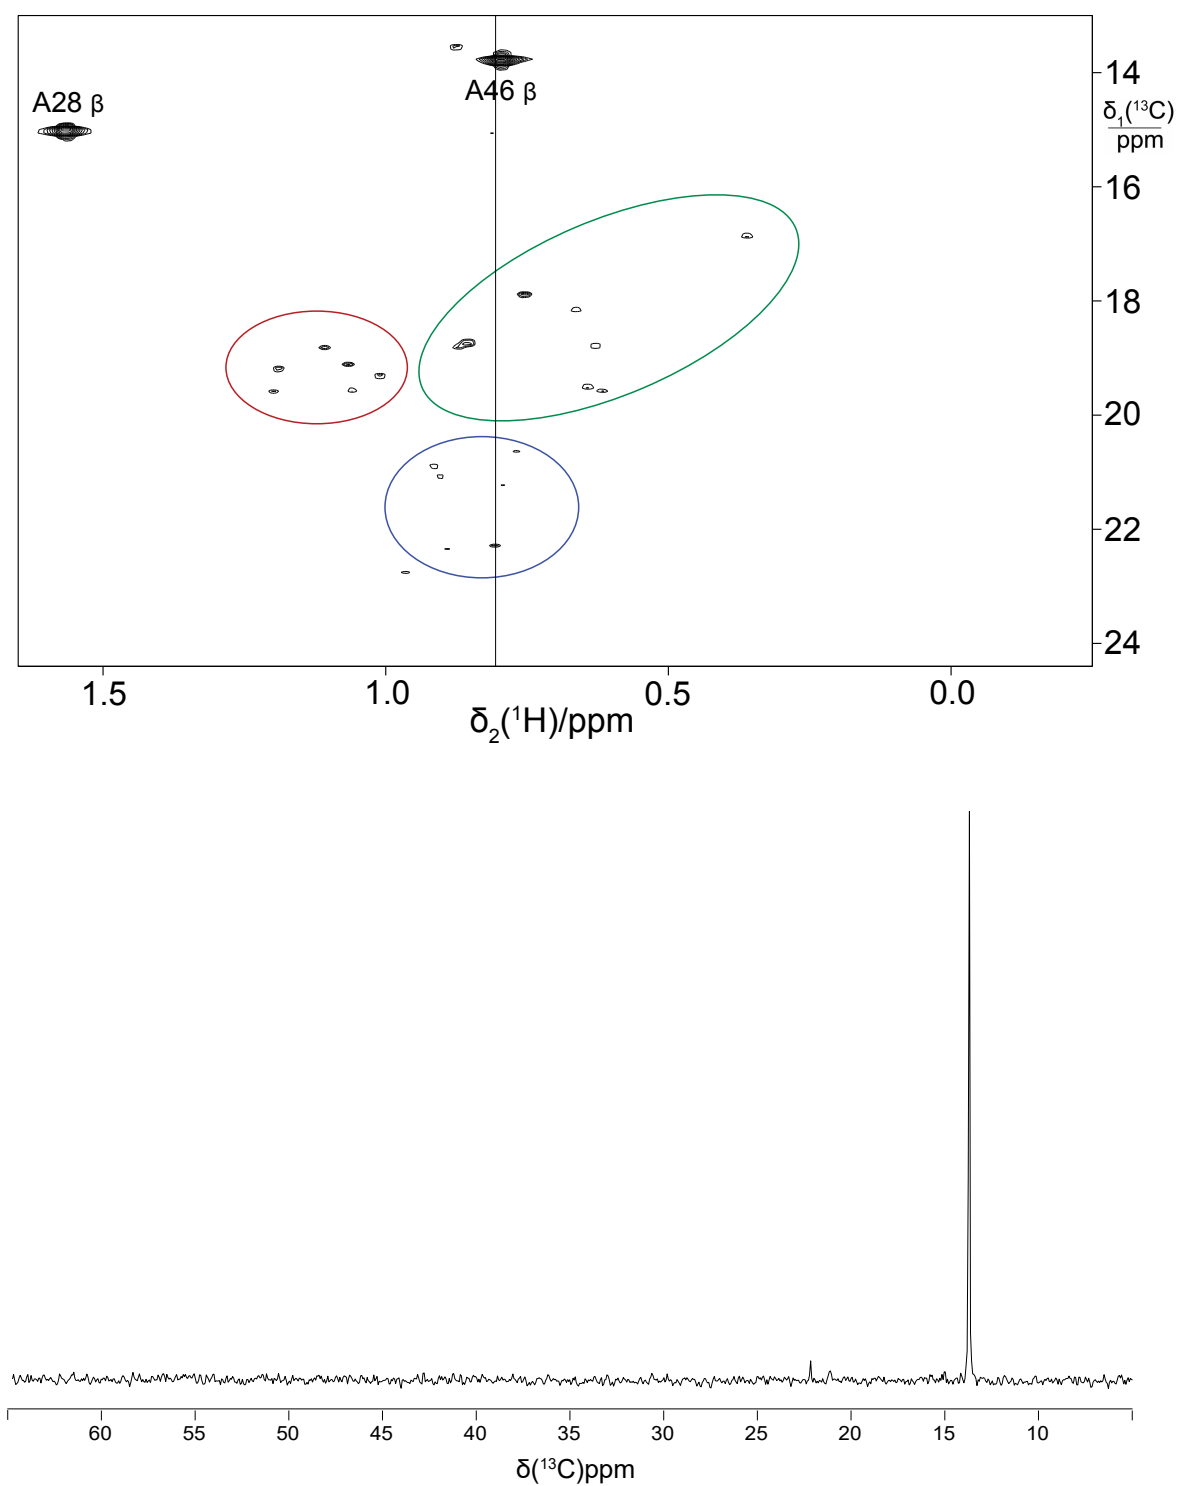

**Figure S5.**  $^{13}\text{C}$ -HSQC spectrum of ubiquitin (Figure 3B in the main text) plotted at lower contour levels. The green, red and blue circles identify cross-peaks from valine  $\text{C}^{\gamma 1/\gamma 2}\text{H}_3$ , threonine  $\text{C}^{\gamma}\text{H}_3$  and leucine  $\text{C}^{\delta 1/\delta 2}\text{H}_3$  groups, respectively. The contour levels were plotted with a scaling factor of 1.4. Undesired cross-peaks are about 34-fold weaker than the expected cross-peaks. A vertical line marks the location of the cross section displayed in the lower panel.

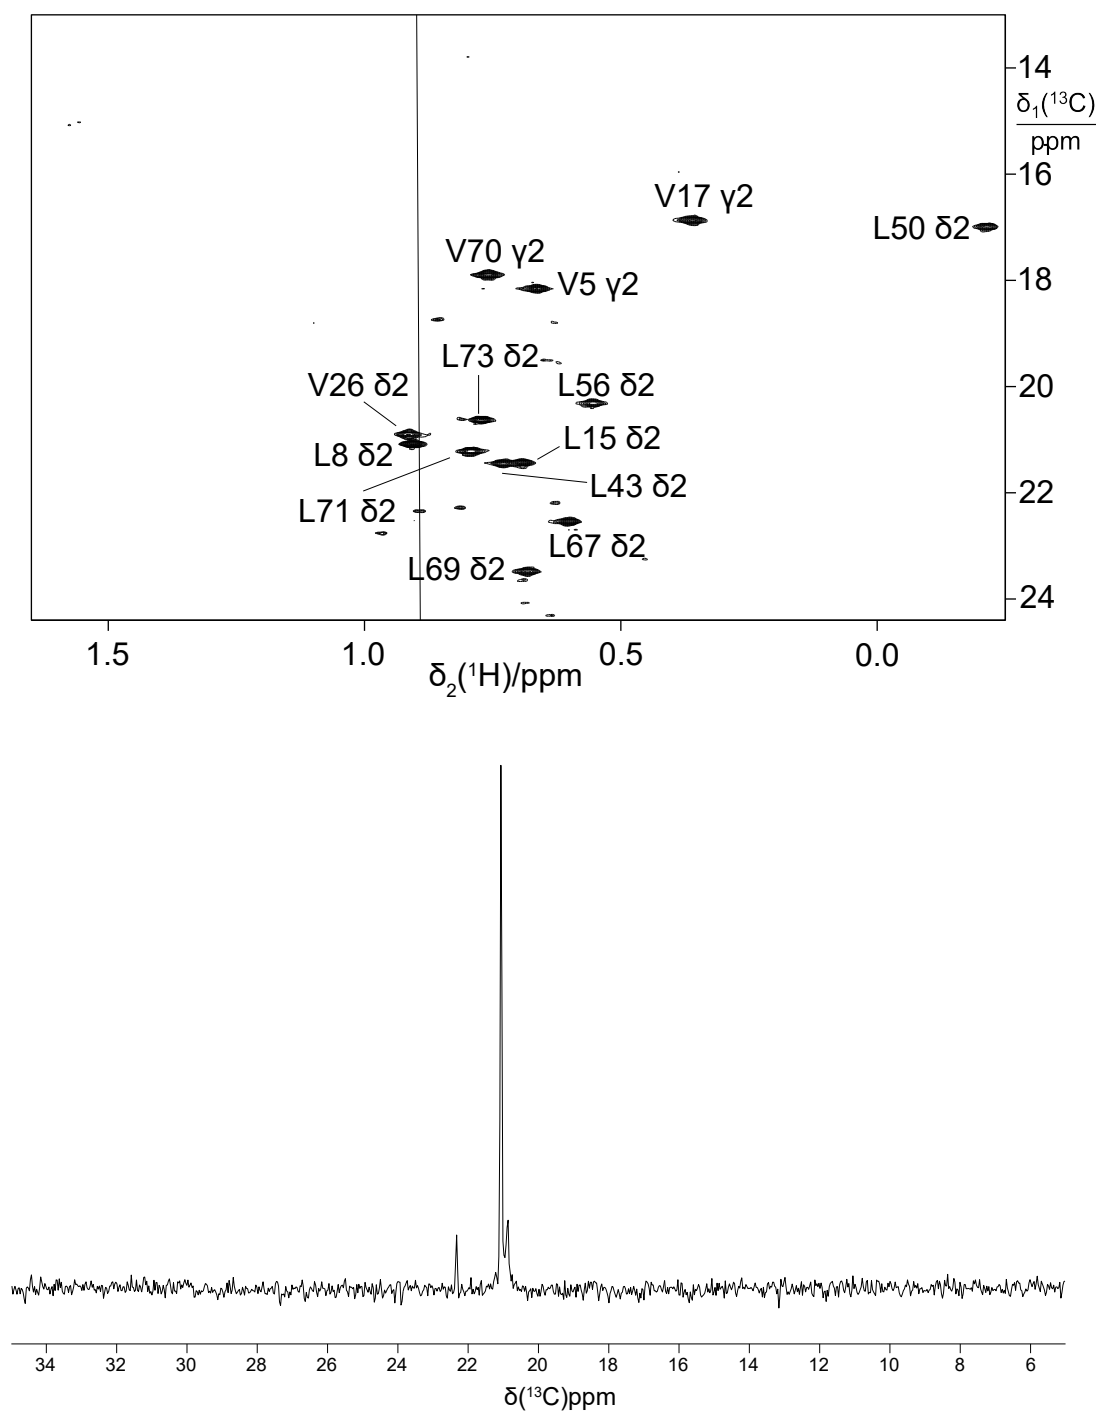

**Figure S6.**  $^{13}\text{C}$ -HSQC spectrum of ubiquitin (Figure 4 in the main text) plotted at lower contour levels. Undesired cross-peaks are about 10-fold weaker than the expected cross-peaks. Subsequent contour levels were plotted with a scaling factor of 1.4. A vertical line marks the location of the cross-section shown in the lower panel.
